# Supplementary material for: Dynamics of SARS-CoV-2 Antibody Responses up to 9 Months Post-Vaccination in Individuals with Previous SARS-CoV-2 Infection Receiving Inactivated Vaccines
Source: MDPI journal article supplement (doi:10.3390/v15040917), 2023-04-04
Supplement: s1 [file s1]

**Supplementary Table S1.** SARS-CoV-2-specific antibody levels in SARS-CoV-2 Recovered individuals with different disease severity.

|                     | Mild and Moderate<br>( <i>n</i> = 43) | Severe<br>( <i>n</i> = 15) | <i>p</i> values* |
|---------------------|---------------------------------------|----------------------------|------------------|
| <b>WT. NAb</b>      |                                       |                            |                  |
| T0                  | 17.8                                  | 22.60                      | 0.6286           |
| T1                  | 50.2                                  | 40.80                      | 0.6577           |
| T2                  | 33.2                                  | 29.30                      | 0.6730           |
| T3                  | 27.7                                  | 17.95                      | 0.1589           |
| <b>WT. NP IgG</b>   |                                       |                            |                  |
| T0                  | 19.5                                  | 16.1                       | 0.4230           |
| T1                  | 75.4                                  | 150.2                      | 0.1000           |
| T2                  | 48.5                                  | 72.1                       | 0.8387           |
| T3                  | 61.0                                  | 48.0                       | 0.2383           |
| <b>WT. S1 IgG</b>   |                                       |                            |                  |
| T0                  | 138.4                                 | 138.9                      | 0.8730           |
| T1                  | 322.7                                 | 311.2                      | 0.9241           |
| T2                  | 236.4                                 | 232.1                      | 0.9232           |
| T3                  | 208.7                                 | 157.2                      | 0.1876           |
| <b>Omic. NAb</b>    |                                       |                            |                  |
| T0                  | 6.6                                   | 8.3                        | 0.9553           |
| T1                  | 27.5                                  | 31.3                       | 0.7580           |
| T2                  | 23.6                                  | 25.0                       | 0.9786           |
| T3                  | 15.1                                  | 4.4                        | 0.0251           |
| <b>Omic. S1 IgG</b> |                                       |                            |                  |
| T0                  | 42.5                                  | 59.9                       | 0.6600           |
| T1                  | 154.0                                 | 137.3                      | 0.7978           |
| T2                  | 92.2                                  | 87.6                       | 0.7559           |
| T3                  | 89.9                                  | 63.0                       | 0.1743           |

NAb, neutralization antibodies. WT, wild-type strain. Omic, Omicron. NP, nucleoside protein. All values are expressed as median.

\* *p* values calculated using a two-sided Mann–Whitney U test.

**Supplementary Table S2.** SARS-CoV-2-specific antibody levels in SARS-CoV-2 Recovered individuals according to age.

|                   | Age (≤ 60 years)<br>( <i>n</i> = 40) | Age (> 60 years)<br>( <i>n</i> = 18) | <i>p</i> values* |
|-------------------|--------------------------------------|--------------------------------------|------------------|
| <b>WT. NAb</b>    |                                      |                                      |                  |
| T0                | 17.9                                 | 23.9                                 | 0.2691           |
| T1                | 46.4                                 | 43.4                                 | 0.7580           |
| T2                | 32.3                                 | 37.5                                 | 0.2346           |
| T3                | 27.9                                 | 18.0                                 | 0.0662           |
| <b>WT. NP IgG</b> |                                      |                                      |                  |
| T0                | 17.3                                 | 32.1                                 | 0.0146           |
| T1                | 75.3                                 | 152.6                                | 0.1013           |
| T2                | 46.6                                 | 91.2                                 | 0.4838           |
| T3                | 55.4                                 | 48.0                                 | 0.4547           |
| <b>WT. S1 IgG</b> |                                      |                                      |                  |
| T0                | 136.5                                | 164.5                                | 0.2627           |
| T1                | 319.5                                | 325.8                                | >0.9999          |

|                     |       |       |        |
|---------------------|-------|-------|--------|
| T2                  | 228.5 | 235.7 | 0.3261 |
| T3                  | 214.2 | 172.5 | 0.1633 |
| <b>Omic. NAb</b>    |       |       |        |
| T0                  | 5.8   | 14.9  | 0.0651 |
| T1                  | 25.4  | 36.2  | 0.3790 |
| T2                  | 13.6  | 30.6  | 0.1736 |
| T3                  | 21.5  | 4.9   | 0.1042 |
| <b>Omic. S1 IgG</b> |       |       |        |
| T0                  | 34.1  | 61.2  | 0.3521 |
| T1                  | 158.6 | 121.4 | 0.5141 |
| T2                  | 90.8  | 113.6 | 0.5092 |
| T3                  | 90.8  | 67.3  | 0.1777 |

NAb, neutralization antibodies. WT, wild-type strain. Omic, Omicron. NP, nucleoside protein. All values are expressed as median.

\* *p* values calculated using a two-sided Mann–Whitney U test.

**Supplementary Table S3.** SARS-CoV-2-specific antibody levels in SARS-CoV-2 Recovered individuals according to gender.

|                     | Male ( <i>n</i> = 32) | Female ( <i>n</i> = 26) | <i>p</i> values* |
|---------------------|-----------------------|-------------------------|------------------|
| <b>WT. NAb</b>      |                       |                         |                  |
| T0                  | 17.7                  | 21.7                    | 0.4578           |
| T1                  | 43.5                  | 46.3                    | 0.3398           |
| T2                  | 31.6                  | 37.7                    | 0.3090           |
| T3                  | 26.6                  | 25.8                    | 0.4820           |
| <b>WT. NP IgG</b>   |                       |                         |                  |
| T0                  | 18.0                  | 25.3                    | 0.2434           |
| T1                  | 92.5                  | 78.8                    | 0.6827           |
| T2                  | 51.9                  | 72.7                    | 0.9634           |
| T3                  | 64.6                  | 39.4                    | 0.4007           |
| <b>WT. S1 IgG</b>   |                       |                         |                  |
| T0                  | 126.0                 | 174.0                   | 0.1476           |
| T1                  | 311.2                 | 340.3                   | 0.2630           |
| T2                  | 223.2                 | 243.9                   | 0.1015           |
| T3                  | 176.5                 | 194.9                   | 0.3096           |
| <b>Omic. NAb</b>    |                       |                         |                  |
| T0                  | 7.9                   | 6.0                     | 0.9609           |
| T1                  | 26.8                  | 36.2                    | 0.9836           |
| T2                  | 20.4                  | 41.2                    | 0.4022           |
| T3                  | 13.2                  | 14.7                    | 0.9123           |
| <b>Omic. S1 IgG</b> |                       |                         |                  |
| T0                  | 33.6                  | 63.6                    | 0.1476           |
| T1                  | 126.7                 | 154.0                   | 0.4918           |
| T2                  | 81.5                  | 115.4                   | 0.2981           |
| T3                  | 89.9                  | 75.6                    | 0.6852           |

NAb, neutralization antibodies. WT, wild-type strain. Omic, Omicron. NP, nucleoside protein. All values are expressed as median.

\* *p* values calculated using a two-sided Mann–Whitney U test.

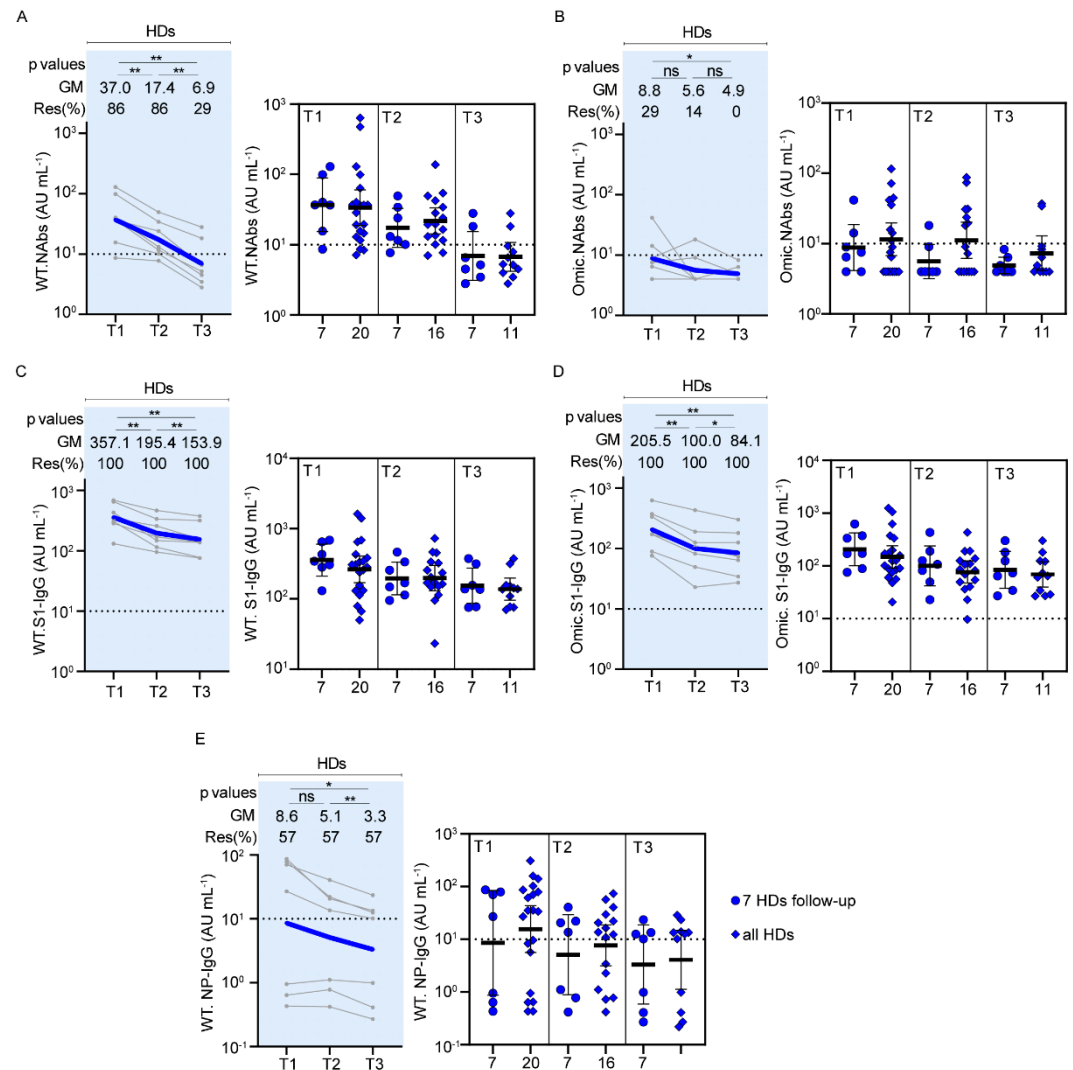

**Supplementary Figure S1.** Dynamics of virus-specific antibodies in 7 HDs with longitudinal follow-up. The left parts display kinetics in NAb<sub>s</sub> against wild-type strain (A), NAb<sub>s</sub> against Omicron (B), Spike S1 domain-specific antibodies against wild-type strain (C), Spike S1 domain-specific antibodies against Omicron (D), and nucleoside protein-specific IgG antibodies against wild-type strain (E) in 7 HDs at 3, 6, and 9 months after the 3rd vaccination. Individuals are shown as gray symbols with connecting lines. Geometric means are shown in thick blue lines. The right panel displays the comparison of antibodies between 7 HDs and all HDs over the three time points. Seven HDs with longitudinal follow-up are shown in blue circles and all HDs are shown in blue diamonds. Dotted lines indicate the cut-off value. Statistics were calculated using Wilcoxon's signed-rank test for paired groups and Mann-Whitney U test for unpaired groups: \*  $p < 0.05$ ; \*\*  $p < 0.01$ ; \*\*\*  $p < 0.001$ ; \*\*\*\*  $p < 0.0001$ . GM, geometric mean; Res, responders; NAb<sub>s</sub>, neutralizing antibodies; WT, wild-type strain; Omic, Omicron.

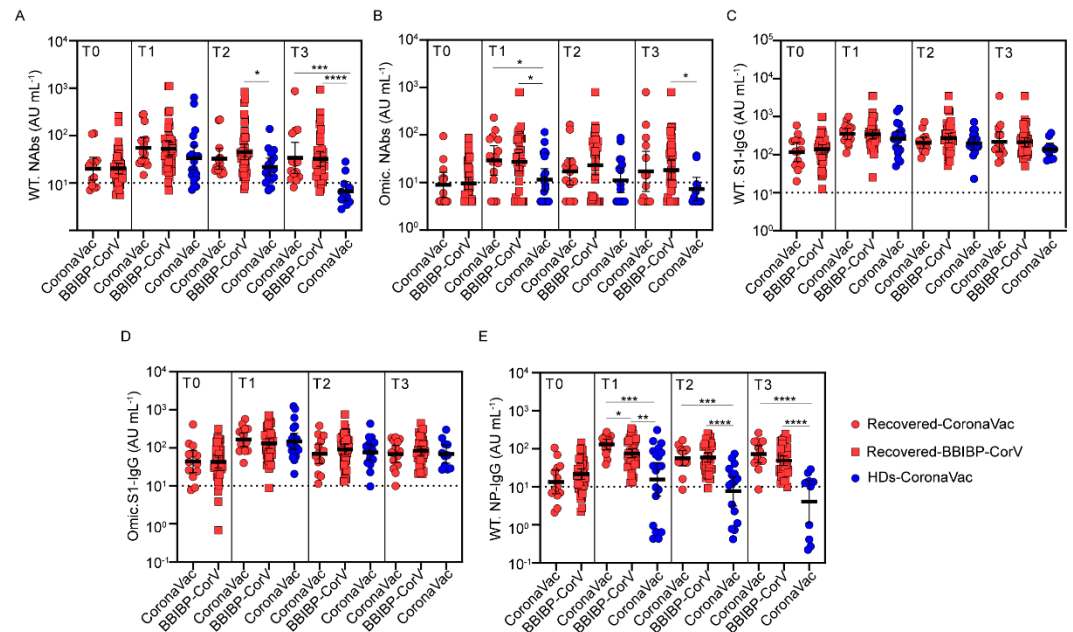

**Supplementary Figure S2.** SARS-CoV-2-specific antibody levels in individuals with previous SARS-CoV-2 infection with different vaccination. The scatter diagrams show the comparison of NAbs against wild-type strain (A), NAbs against Omicron (B), Spike S1 domain-specific antibodies against wild-type strain (C), Spike S1 domain-specific antibodies against Omicron (D), and nucleoside protein-specific IgG antibodies against wild-type strain (E) in SARS-CoV-2 Recovered individuals receiving CoronaVac (shown in red circle), SARS-CoV-2 Recovered individuals receiving BBIBP-CorV (shown in red square), and HDs receiving CoronaVac (shown in blue circle). Dotted lines indicate the cut-off value. Statistics were calculated using Wilcoxon's signed-rank test for paired groups and Mann-Whitney U test for unpaired groups: \*  $p < 0.05$ ; \*\*  $p < 0.01$ ; \*\*\*  $p < 0.001$ ; \*\*\*\*  $p < 0.0001$ . NAbs, neutralizing antibodies; WT, wild-type strain; Omic, Omicron.

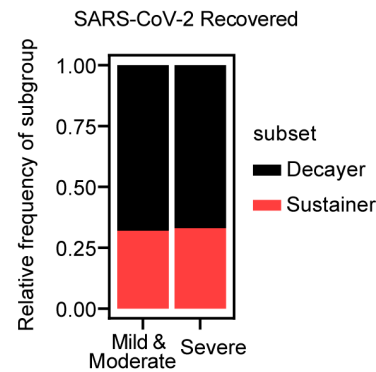

**Supplementary Figure S3.** Frequency of Sustainer and Decayer subsets in different disease severity. Sustainers are displayed in red and Decayers in black color.

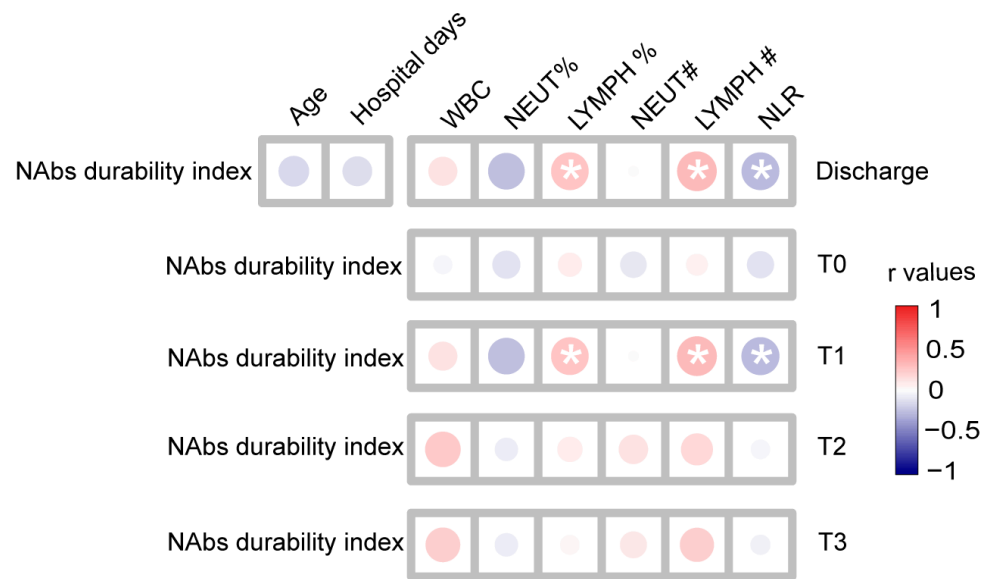

**Supplementary Figure S4.** Correlation analysis between NAb durability index and clinical variables in individuals with previous SARS-CoV-2 infection. The correlation matrixes of antibody levels are calculated using nonparametric Spearman rank correlation in individuals with previous SARS-CoV-2 infection. Positive correlations are displayed in red and negative correlations in blue color. The size and color of each dot in the triangular matrix show the strength of correlation between the variables: \*  $p < 0.05$ ; \*\*  $p < 0.01$ ; \*\*\*  $p < 0.001$ ; \*\*\*\*  $p < 0.0001$ . NAb, neutralizing antibodies. WBC, white blood cell. NEUT %, neutrophil %. LYMPH %, lymphocyte %. NEUT #, neutrophil counts. LYMPH #, lymphocyte counts. NLR, neutrophil-to-lymphocyte ratio.
